# Supplementary material
Source: Royal Society of Chemistry journal article supplement (doi:10.1039/d5fo05626h)
Supplement: d5fo05626h1.pdf [file d5fo05626h1.pdf]

**Supplemental Table 1. Variance inflation factors of variables included in multivariable adjusted models.**

| Variable                          | Tolerance | VIF  |
|-----------------------------------|-----------|------|
| Tertiles of ultra-processed foods | 0.81      | 1.23 |
| Sex                               | 0.91      | 1.10 |
| Age                               | 0.59      | 1.71 |
| Energy intake                     | 0.94      | 1.06 |
| Marital status                    | 0.72      | 1.39 |
| Education status                  | 0.93      | 1.08 |
| Physical activity                 | 0.94      | 1.06 |
| House ownership status            | 0.85      | 1.18 |
| Family size                       | 0.89      | 1.12 |
| Smoking status                    | 0.94      | 1.06 |
| Antihyperlipidemic drug usage     | 0.88      | 1.14 |
| Body mass index                   | 0.95      | 1.06 |

Abbreviations: VIF: variance inflation factor.

**Supplemental Table 2. Multivariate adjusted odds ratios (ORs) and 95% confidence intervals (CIs) for HTGW phenotype across energy-adjusted tertiles of ultra-processed foods intake, excluding participants with type 2 diabetes (n=28)<sup>1</sup>**

|                                   | Tertiles of energy-adjusted ultra-processed foods intake |                           |                           | P-trend <sup>2</sup> | Per 1 tertile increase   |
|-----------------------------------|----------------------------------------------------------|---------------------------|---------------------------|----------------------|--------------------------|
|                                   | T <sub>1</sub><br>(n=160)                                | T <sub>2</sub><br>(n=170) | T <sub>3</sub><br>(n=170) |                      |                          |
| Ultra-processed foods intake(g/d) | < 91.62                                                  | 91.62 - 157.34            | > 157.34                  |                      |                          |
| <b>Cases</b>                      | 28                                                       | 33                        | 47                        |                      |                          |
| Crude                             | 1.00 (Ref.)                                              | 1.14 (0.65, 1.98)         | <b>1.80 (1.06, 3.06)</b>  | <b>0.03</b>          | <b>1.36 (1.04, 1.77)</b> |
| Model 1                           | 1.00 (Ref.)                                              | 1.55 (0.85, 2.83)         | <b>2.66 (1.46, 4.84)</b>  | <b>0.01</b>          | <b>1.64 (1.22, 2.21)</b> |
| Model 2                           | 1.00 (Ref.)                                              | 1.44 (0.78, 2.66)         | <b>2.41 (1.31, 4.45)</b>  | <b>0.01</b>          | <b>1.56 (1.15, 2.12)</b> |
| Model 3                           | 1.00 (Ref.)                                              | 1.45 (0.74, 2.83)         | <b>2.56 (1.31, 4.99)</b>  | <b>0.01</b>          | <b>1.61 (1.16, 2.25)</b> |

<sup>1</sup>All values are odds ratios and 95% confidence intervals. Model 1: Adjusted for age, sex, and energy intake; Model 2: Additionally adjusted for marital status, education, smoking, physical activity, house ownership status, family size, and antihyperlipidemic drug usage; Model 3: Additionally adjusted for body mass index.

<sup>2</sup>P-trend was obtained by treating tertiles of ultra-processed food intake as a continuous rather than categorical variable. Bold values indicate P<0.05. Abbreviation: Ref: reference.

**Supplemental Table 3. Multivariate adjusted odds ratios (ORs) and 95% confidence intervals (CIs) for HTGW phenotype across energy-adjusted tertiles of components of ultra-processed foods<sup>1</sup>**

|                                       | Tertiles of energy-adjusted ultra-processed foods intake |                           |                           | P-trend <sup>2</sup> |
|---------------------------------------|----------------------------------------------------------|---------------------------|---------------------------|----------------------|
|                                       | T <sub>1</sub><br>(n=176)                                | T <sub>2</sub><br>(n=176) | T <sub>3</sub><br>(n=176) |                      |
| <b>Industrial breads and cakes</b>    |                                                          |                           |                           |                      |
| Cases                                 | 38                                                       | 31                        | 44                        |                      |
| Crude                                 | 1.00 (Ref.)                                              | 0.78 (0.46, 1.32)         | 1.21 (0.74, 1.99)         | 0.44                 |
| Fully-adjusted model                  | 1.00 (Ref.)                                              | 0.93 (0.50, 1.71)         | 1.42 (0.79, 2.57)         | 0.23                 |
| <b>Processed meats and fast foods</b> |                                                          |                           |                           |                      |
| Cases                                 | 32                                                       | 33                        | 48                        |                      |
| Crude                                 | 1.00 (Ref.)                                              | 1.04 (0.61, 1.78)         | <b>1.69 (1.02, 2.82)</b>  | <b>0.04</b>          |
| Fully-adjusted model                  | 1.00 (Ref.)                                              | 1.04 (0.54, 1.99)         | <b>1.88 (1.04, 3.45)</b>  | <b>0.03</b>          |
| <b>Sweets</b>                         |                                                          |                           |                           |                      |
| Cases                                 | 35                                                       | 36                        | 42                        |                      |
| Crude                                 | 1.00 (Ref.)                                              | 0.97 (0.59, 1.60)         | 0.81 (0.49, 1.36)         | 0.44                 |
| Fully-adjusted model                  | 1.00 (Ref.)                                              | 1.07 (0.59, 1.96)         | 0.97 (0.54, 1.74)         | 0.92                 |
| <b>Non-dairy beverages</b>            |                                                          |                           |                           |                      |
| Cases                                 | 36                                                       | 31                        | 46                        |                      |
| Crude                                 | 1.00 (Ref.)                                              | 0.83 (0.49, 1.42)         | 1.38 (0.84, 2.27)         | 0.19                 |
| Fully-adjusted model                  | 1.00 (Ref.)                                              | 0.85 (0.44, 1.65)         | 1.39 (0.76, 2.57)         | 0.22                 |
| <b>Dairy beverages</b>                |                                                          |                           |                           |                      |
| Cases                                 | 39                                                       | 36                        | 38                        |                      |
| Crude                                 | 1.00 (Ref.)                                              | 0.90 (0.54, 1.51)         | 1.14 (0.61, 2.13)         | 0.90                 |
| Fully-adjusted model                  | 1.00 (Ref.)                                              | 0.97 (0.58, 1.61)         | 1.11 (0.59, 2.10)         | 0.76                 |
| <b>Potato chips and salty snacks</b>  |                                                          |                           |                           |                      |
| Cases                                 | 39                                                       | 35                        | 39                        |                      |
| Crude                                 | 1.00 (Ref.)                                              | 0.87 (0.52, 1.46)         | 1.00 (0.60, 1.66)         | <0.99                |
| Fully-adjusted model                  | 1.00 (Ref.)                                              | 0.98 (0.52, 1.85)         | 1.23 (0.67, 2.26)         | 0.50                 |
| <b>Oils and sauces</b>                |                                                          |                           |                           |                      |
| Cases                                 | 35                                                       | 36                        | 42                        |                      |
| Crude                                 | 1.00 (Ref.)                                              | 1.04 (0.61, 1.75)         | 1.26 (0.76, 2.10)         | 0.36                 |
| Fully-adjusted model                  | 1.00 (Ref.)                                              | 1.25 (0.66, 2.39)         | 1.43 (0.77, 2.67)         | 0.26                 |

<sup>1</sup>All values are odds ratios and 95% confidence intervals. Fully-adjusted model: Adjusted for age, sex, energy intake, marital status, education, smoking, physical activity, house ownership status, family size, antihyperlipidemic drug usage, and body mass index.

<sup>2</sup>P-trend was obtained by the use of tertiles of ultra-processed food intake as a continuous rather than categorical variable. Bold values indicate P<0.05.

Abbreviation: Ref: reference.

**Supplemental Table 4. Linear associations between tertiles of ultra-processed foods components and oxidative stress and inflammation biomarkers<sup>1</sup>**

|                                       | Crude                          | Fully-adjusted model           |
|---------------------------------------|--------------------------------|--------------------------------|
| <b>Industrial breads and cakes</b>    |                                |                                |
| MDA (nmol/mL)                         | <b>10.301 (0.827, 19.774)</b>  | 8.293 (-1.571, 18.157)         |
| SOD (Unit)                            | 0.008 (-0.044, 0.060)          | -0.009 (-0.063, 0.044)         |
| GPX (mU/mL)                           | 0.372 (-0.024, 0.768)          | 0.310 (-0.104, 0.724)          |
| CRP (mg/L)                            | 0.005 (-0.302, 0.311)          | 0.104 (-0.216, 0.424)          |
| <b>Processed meats and fast foods</b> |                                |                                |
| MDA (nmol/mL)                         | <b>10.902 (1.434, 20.371)</b>  | 9.126 (-0.761, 19.013)         |
| SOD (Unit)                            | 0.040 (-0.011, 0.092)          | 0.028 (-0.025, 0.082)          |
| GPX (mU/mL)                           | 0.301 (-0.095, 0.697)          | 0.230 (-0.186, 0.646)          |
| CRP (mg/L)                            | -0.056 (-0.363, 0.250)         | 0.033 (-0.288, 0.354)          |
| <b>Sweets</b>                         |                                |                                |
| MDA (nmol/mL)                         | <b>9.500 (0.006, 18.993)</b>   | 8.723 (-0.755, 18.202)         |
| SOD (Unit)                            | <b>-0.072 (-0.123, -0.020)</b> | <b>-0.072 (-0.123, -0.021)</b> |
| GPX (mU/mL)                           | 0.218 (-0.179, 0.615)          | 0.211 (-0.188, 0.610)          |
| CRP (mg/L)                            | 0.005 (-0.302, 0.312)          | 0.022 (-0.286, 0.329)          |
| <b>Non-dairy beverages</b>            |                                |                                |
| MDA (nmol/mL)                         | 3.314 (-6.182, 12.811)         | 2.888 (-6.770, 12.546)         |
| SOD (Unit)                            | 0.024 (-0.028, 0.076)          | 0.007 (-0.045, 0.060)          |
| GPX (mU/mL)                           | 0.145 (-0.251, 0.541)          | 0.110 (-0.296, 0.515)          |
| CRP (mg/L)                            | -0.039 (-0.345, 0.267)         | 0.005 (-0.308, 0.317)          |
| <b>Dairy beverages</b>                |                                |                                |
| MDA (nmol/mL)                         | <b>11.171 (1.718, 20.623)</b>  | 8.406 (-1.397, 18.208)         |
| SOD (Unit)                            | -0.002 (-0.054, 0.050)         | -0.011 (-0.065, 0.042)         |
| GPX (mU/mL)                           | 0.298 (-0.098, 0.694)          | 0.221 (-0.191, 0.633)          |
| CRP (mg/L)                            | -0.107 (-0.413, 0.199)         | -0.017 (-0.335, 0.302)         |
| <b>Potato chips and salty snacks</b>  |                                |                                |
| MDA (nmol/mL)                         | 7.937 (-1.539, 17.414)         | 4.448 (-5.624, 14.521)         |
| SOD (Unit)                            | -0.024 (-0.076, 0.028)         | -0.043 (-0.097, 0.012)         |
| GPX (mU/mL)                           | -0.013 (-0.410, 0.383)         | -0.147 (-0.569, 0.276)         |
| CRP (mg/L)                            | -0.029 (-0.335, 0.277)         | 0.098 (-0.229, 0.424)          |
| <b>Oils and sauces</b>                |                                |                                |
| MDA (nmol/mL)                         | 7.083 (-2.399, 16.564)         | 4.641 (-5.140, 14.423)         |
| SOD (Unit)                            | -0.003 (-0.055, 0.049)         | -0.014 (-0.067, 0.039)         |
| GPX (mU/mL)                           | 0.095 (-0.302, 0.491)          | 0.008 (-0.402, 0.419)          |
| CRP (mg/L)                            | 0.084 (-0.222, 0.390)          | 0.178 (-0.139, 0.494)          |

<sup>1</sup>All values are B coefficients and 95% confidence intervals. Fully-adjusted model: Adjusted for age, sex, and body mass index.

Bold values indicate P<0.05.

Abbreviation: MDA, malondialdehyde; SOD, superoxide dismutase; GPX, glutathione peroxidase; CRP, C-reactive protein.
